# Supplementary material for: Coordination Chemistry of Polynitriles, Part XI. Influence of 4,4′-Bipyridine and Solvent on the Crystal and Molecular Structures of Alkaline Earth Pentacyanocyclopentadienides
Source: MDPI journal article supplement (doi:10.3390/chemistry4040101), 2022-11-10
Supplement: s1 [file s1]

## Supporting Information

for

# Coordination Chemistry of Polynitriles, Part XI. Influence of 4,4'-Bipyridine and Solvent on the Crystal and Molecular Structures of Alkaline Earth Pentacyanocyclopentadienides

Patrick Nimax and Karlheinz Sünkel

## Table of Contents

|                                                                                                            |   |
|------------------------------------------------------------------------------------------------------------|---|
| 1. TABLES.....                                                                                             | 2 |
| Table S 1: Hydrogen bond parameters of O–H donors .....                                                    | 2 |
| Table S 2: Hydrogen bond parameters of the C–H donors.....                                                 | 4 |
| Table S 3: Experimental details of the data collections.....                                               | 6 |
| 2. <u>FIGURES</u> .....                                                                                    | 7 |
| Figure S 1: The pentacyanocyclopentadienides in compound <b>2</b> as H-bond acceptors.....                 | 7 |
| Figure S 2: The asymmetric unit of compound <b>6</b> .....                                                 | 7 |
| Figure S 3: The hydrogen bonds around Bipyridine I .....                                                   | 8 |
| Figure S 4: The hydrogen bonds around Bipyridine II .....                                                  | 8 |
| Figure S 5: The hydrogen bonds around Bipyridine III .....                                                 | 8 |
| Figure S 6: The hydrogen bonds around Bipyridine IV .....                                                  | 9 |
| Figure S 7: The $\pi$ -stacking of pentacyanocyclopentadienides in <b>6</b> : side view and top view ..... | 9 |
| Figure S 8: The $\pi$ -stacking of bipyridines in <b>6</b> : side view and top view. ....                  | 9 |

## 1. TABLES

Table S 1: Hydrogen bond parameters of O–H donors

| Compound | D—H $\cdots$ A  | D—H     | H $\cdots$ A | D $\cdots$ A | $\frac{D}{H}\cdots A$ | Symm. Oper.                         |
|----------|-----------------|---------|--------------|--------------|-----------------------|-------------------------------------|
| 1        | O1-H1A...O3     | 0.86(4) | 1.72(4)      | 2.583(3)     | 176(3)                | $x, y, z$                           |
|          | O1-H1B...N104   | 0.89(4) | 2.01(4)      | 2.885(3)     | 168(3)                | $x, y, z$                           |
|          | O2-H2A...N103   | 0.79(4) | 2.16(4)      | 2.934(3)     | 167(3)                | $-x, y, 2.5-z$                      |
|          | O2-H2B...N101   | 0.86(5) | 2.07(5)      | 2.894(3)     | 162                   | $\frac{1}{2}+x, y-\frac{1}{2}, z$   |
|          | O3-H3...N11     | 0.84(5) | 1.90(5)      | 2.728(3)     | 169                   | $x-\frac{1}{2}, \frac{1}{2}-y, 2-z$ |
| 2        | O1-H1W...N103   | 0.87(2) | 2.04(2)      | 2.889(5)     | 166(4)                | $l-x, \frac{1}{2}+y, l-z$           |
|          | O1-H2W...N2     | 0.87(2) | 1.91(3)      | 2.733(5)     | 158(4)                | $l-x, y-\frac{1}{2}, -z$            |
|          | O2-H3W...N5     | 0.89(2) | 1.84(3)      | 2.712(5)     | 166(4)                | $l+x, y, z-l$                       |
|          | O2-H4W...N101   | 0.87(2) | 2.10(3)      | 2.885(5)     | 151(4)                | $x, y, z-l$                         |
|          | O3-H5W...N4     | 0.87(2) | 1.87(2)      | 2.725(5)     | 169(5)                | $2-x, \frac{1}{2}+y, l-z$           |
|          | O3-H6W...N205   | 0.87(2) | 2.08(3)      | 2.906(5)     | 158(4)                | $l+x, y, z$                         |
|          | O4-H7W...N203   | 0.89(2) | 2.04(3)      | 2.893(5)     | 161(4)                | $l-x, \frac{1}{2}+y, l-z$           |
|          | O4-H8W...N6     | 0.90(2) | 1.83(2)      | 2.726(4)     | 169(4)                | $x, y, z$                           |
| 3        | O11-H11M...N10  | 0.84    | 1.95         | 2.769(3)     | 166.2                 | $l-x, l-y, l-z$                     |
|          | O12-H12M...N101 | 0.84    | 2.18         | 2.942(3)     | 150.4                 | $l+x, \frac{1}{2}-y, \frac{1}{2}+z$ |
|          | O13-H13M...N9   | 0.84    | 1.95         | 2.772(3)     | 166.6                 | $-x, l-y, l-z$                      |
|          | O14-H14M...N404 | 0.84    | 2.18         | 2.904(3)     | 144.8                 | $X, \frac{1}{2}-y, \frac{1}{2}+z$   |
|          | O15-H15M...N5   | 0.84    | 2.03         | 2.817(3)     | 155                   | $-x, l-y, l-z$                      |
|          | O16-H16M...N6   | 0.84    | 1.99         | 2.805(3)     | 165                   | $l-x, l-y, l-z$                     |
|          | O17-H17M...N11  | 0.84    | 2.01         | 2.823(3)     | 164                   | $-x, l-y, l-z$                      |
|          | O18-H18M...N12  | 0.84    | 2.05         | 2.841(3)     | 156                   | $l-x, l-y, l-z$                     |
|          | O21-H21M...N202 | 0.84    | 2.13         | 2.898(3)     | 152                   | $-x, l-y, l-z$                      |
|          | O22-H22M...N2   | 0.84    | 1.94         | 2.771(3)     | 170                   | $l-x, l-y, l-z$                     |
|          | O23-H23M...N1   | 0.84    | 1.97         | 2.794(3)     | 166                   | $-x, l-y, l-z$                      |
|          | O24-H24M...N102 | 0.84    | 2.16         | 2.952(3)     | 157                   | $-x, \frac{1}{2}+y, \frac{1}{2}-z$  |
|          | O25-H25M...N7   | 0.84    | 2.02         | 2.827(3)     | 162                   | $-x, y-\frac{1}{2}, \frac{1}{2}-z$  |
|          | O26-H26M...N8   | 0.84    | 2.02         | 2.843(3)     | 165                   | $l-x, y-\frac{1}{2}, \frac{1}{2}-z$ |
|          | O27-H27M...N3   | 0.84    | 1.91         | 2.738(3)     | 170                   | $-x, l-y, l-z$                      |
|          | O28-H28M...N4   | 0.84    | 1.97         | 2.782(3)     | 162                   | $l-x, l-y, l-z$                     |
| 4        | O1W-H11W...N11  | 0.83(2) | 1.91(2)      | 2.724(3)     | 169(3)                | $-x, l-y, l-z$                      |
|          | O1W-H12W...N204 | 0.81(2) | 2.08(2)      | 2.874(3)     | 163(3)                | $-x, -y, -z$                        |
|          | O2W-H21W...N20  | 0.82(2) | 1.98(2)      | 2.780(3)     | 166(3)                | $l-x, -y, l-z$                      |
|          | O2W-H22W...O1W  | 0.82(2) | 2.20(2)      | 2.971(2)     | 158(3)                | $-x, -y, l-z$                       |
|          | O1B-H1B...N10   | 0.78(3) | 1.95(3)      | 2.730(3)     | 176(4)                | $x-l, y, z$                         |
|          | O2B-H2B...N21   | 0.85(4) | 1.93(4)      | 2.770(3)     | 170(3)                | $x, y, z-l$                         |

|                 | O3B-H3B...N105  | 0.84  | 2.40        | 3.13(2)     | 146                     | $x, y, l+z$                             |
|-----------------|-----------------|-------|-------------|-------------|-------------------------|-----------------------------------------|
| <i>Compound</i> | $D-H\cdots A$   | $D-H$ | $H\cdots A$ | $D\cdots A$ | $\frac{D-H}{H\cdots A}$ | <i>Symm. Oper.</i>                      |
| <b>5</b>        | O13-H13E...N30  | 0.85  | 2.09        | 2.91        | 166                     | $l+x, l-y, z- \frac{1}{2}$              |
|                 | O16-H16E...N44  | 0.84  | 2.09        | 2.91        | 166                     |                                         |
|                 | O19-H19E...N103 | 0.85  | 2.08        | 2.88        | 158                     |                                         |
|                 | O22-H22E...O40  | 0.87  | 2.20        | 2.76        | 123                     |                                         |
|                 | O25-H25E...N105 | 0.89  | 2.17        | 2.85        | 133                     |                                         |
|                 | O28-H28E...N104 | 0.83  | 2.02        | 2.84        | 172                     |                                         |
|                 | O31-H31E...N60  | 0.85  | 2.11        | 2.91        | 158                     |                                         |
|                 | O34-H34E...N106 | 0.88  | 2.07        | 2.88        | 154                     |                                         |
|                 | O37-H37E...O43  | 0.86  | 1.94        | 2.72        | 149                     | $x-l, y, z$                             |
|                 | O40-H40E...N11  | 0.87  | 2.48        | 2.98        | 118                     |                                         |
|                 | O43-H43E...N34  | 0.84  | 2.35        | 3.11        | 152                     | $l+x, y, z$                             |
|                 | O1W-H11W...O5W  | 0.86  | 1.99        | 2.71        | 140                     |                                         |
|                 | O1W-H12W...N1   | 0.86  | 2.57        | 3.25        | 138                     |                                         |
|                 | O2W-H21W...O5W  | 0.86  | 2.13        | 2.68        | 121                     |                                         |
|                 | O3W-H31W...N22  | 0.84  | 2.13        | 2.96        | 170                     | $x, l-y, z+ \frac{1}{2}$                |
|                 | O3W-H32W...N41  | 0.84  | 2.10        | 2.89        | 158                     | $x, l-y, z- \frac{1}{2}$                |
|                 | O4W-H41W...N62  | 0.85  | 2.08        | 2.92        | 171                     | $x, l-y, z+ \frac{1}{2}$                |
|                 | O4W-H42W...N51  | 0.85  | 2.10        | 2.94        | 172                     | $x, l-y, z- \frac{1}{2}$                |
|                 | O5W-H51W...N5   | 0.86  | 1.90        | 2.74        | 166                     | $x, l-y, z- \frac{1}{2}$                |
|                 | O5W-H52W...N102 | 0.86  | 1.96        | 2.75        | 152                     | $x, l-y, z+ \frac{1}{2}$                |
| <b>6</b>        | O1BU-H1BU...N94 | 0.85  | 2.00        | 2.83        | 165                     | $\frac{1}{2} -x, y- \frac{1}{2}, l.5-z$ |
|                 | O5-H5...N9      | 0.85  | 1.92        | 2.77        | 171                     |                                         |
|                 | O6-H6a/b...N4   | 0.84  | 1.93        | 2.77        | 172                     | $l.5-x, y- \frac{1}{2}, l.5-z$          |
|                 | O1W-H11W...N73  | 0.85  | 2.66        | 3.47        | 162                     | $l-x, -y, 2-z$                          |
|                 | O1W-H12W...N8   | 0.85  | 1.93        | 2.75        | 162                     | $l+x, y, z$                             |
|                 | O2W-H21W...N91  | 0.85  | 2.05        | 2.90        | 172                     |                                         |
|                 | O2W-H22W...N2   | 0.85  | 1.95        | 2.77        | 162                     | $x-l, y, z$                             |
|                 | O3W-H31W...O1W  | 0.84  | 2.14        | 2.94        | 160                     |                                         |
|                 | O3W-H32W...N7   | 0.84  | 1.93        | 2.75        | 166                     |                                         |
|                 | O4W-H41W...N73  | 0.83  | 2.06        | 2.89        | 175                     | $l-x, -y, 2-z$                          |
|                 | O4W-H42W...N6   | 0.92  | 1.81        | 2.71        | 165                     | $X+l, y, z$                             |

Table S 2: Hydrogen bond parameters of the C–H donors

| Compound | D—H...A        | D—H  | H...A | D...A    | D—H...A | Symm. Oper.                               |
|----------|----------------|------|-------|----------|---------|-------------------------------------------|
| <b>1</b> | C10-H10...O1   | 0.95 | 2.67  | 3.161(3) | 113     | $-x + \frac{1}{2} - y + \frac{1}{2}, 2-z$ |
|          | C13-H13...N105 | 0.95 | 2.60  | 3.491(4) | 157     | $x, y, z$                                 |
|          | C16-H16...N102 | 0.95 | 2.45  | 3.351(4) | 157     | $l+x, l-y, z - \frac{1}{2}$               |
|          | C18-H18...N105 | 0.95 | 2.59  | 3.527(4) | 167     | $x, y, z$                                 |
| <b>2</b> | C2-H2...N204   | 0.95 | 2.53  | 3.460(7) | 166     | $l-x, \frac{1}{2} + y, l-z$               |
|          | C6-H6...N105   | 0.95 | 2.45  | 3.352(7) | 159     | $l-x, \frac{1}{2} + y, -z$                |
|          | C7-H7...N104   | 0.95 | 2.60  | 3.497(7) | 157     | $l-x, \frac{1}{2} + y, -z$                |
|          | C9-H9...N204   | 0.95 | 2.58  | 3.500(7) | 162     | $l-x, \frac{1}{2} + y, l-z$               |
|          | C11-H11...N101 | 0.95 | 2.69  | 3.633(7) | 172     | $x, y, z-l$                               |
|          | C12-H12...N102 | 0.95 | 2.57  | 3.507(7) | 168     | $x, y, z-l$                               |
|          | C16-H16...N202 | 0.95 | 2.42  | 3.301(7) | 154     | $x+l, y, z+l$                             |
|          | C17-H17...N201 | 0.95 | 2.66  | 3.557(7) | 157     | $x+l, y, z+l$                             |
|          | C19-H19...N102 | 0.95 | 2.62  | 3.549(7) | 166     | $x, y, z-l$                               |
|          | C7-H7...N402   | 0.95 | 2.42  | 3.277(4) | 150     | $x, y, z$                                 |
| <b>3</b> | C9-H9...N400   |      | 2.52  | 3.460(4) | 169     | $x, \frac{1}{2} - y, \frac{1}{2} + z$     |
|          | C10-H10...N102 |      | 2.61  | 3.555(4) | 171     | $l+x, \frac{1}{2} - y, \frac{1}{2} + z$   |
|          | C16-H16...N403 |      | 2.66  | 3.460(4) | 143     | $x, y, z$                                 |
|          | C22-H22...N301 |      | 2.53  | 3.407(4) | 153     | $-x, \frac{1}{2} + y, \frac{1}{2} - z$    |
|          | C26-H26...N204 |      | 2.66  | 3.289(4) | 124     | $-x, \frac{1}{2} + y, \frac{1}{2} - z$    |
|          | C30-H30...N201 |      | 2.55  | 3.406(4) | 149     | $-x, l-y, l-z$                            |
|          | C32-H32...N203 |      | 2.52  | 3.471(4) | 175     | $-x, \frac{1}{2} + y, \frac{1}{2} - z$    |
|          | C36-H36...N100 |      | 2.63  | 3.535(4) | 160     | $-x, \frac{1}{2} + y, \frac{1}{2} - z$    |
|          | C37-H37...N203 |      | 2.68  | 3.409(4) | 134     | $-x, \frac{1}{2} + y, \frac{1}{2} - z$    |
|          | C45-H45...N200 |      | 2.58  | 3.484(4) | 158     | $x, y+l, z$                               |
|          | C50-H50...N400 |      | 2.60  | 3.518(4) | 162     | $x, y+l, z$                               |
|          | C59-H59...N401 |      | 2.52  | 3.276(4) | 137     | $x, y+l, z$                               |
| <b>4</b> | C2-H2...N105   | 0.95 | 2.52  | 3.208(3) | 129     | $x, y, z$                                 |
|          | C6-H6...N101   | 0.95 | 2.62  | 3.347(3) | 134     | $x, y, z$                                 |
|          | C11-H11...N203 | 0.95 | 2.68  | 3.505(4) | 145     | $l+x, l+y, z$                             |
|          | C13-H13...O3B  | 0.95 | 2.66  | 3.29(2)  | 125     | $x, y, z-l$                               |
|          | C26-H26...N202 | 0.95 | 2.65  | 3.282(4) | 124     | $-x, -y, l-z$                             |

| <i>Compound</i> | <i>D—H···A</i>  | <i>D—H</i> | <i>H···A</i> | <i>D···A</i> | <i>D—H···A</i> | <i>Symm. Oper.</i>                            |
|-----------------|-----------------|------------|--------------|--------------|----------------|-----------------------------------------------|
| <b>5</b>        | C201-H201...N24 | 0.95       | 2.65         | 3.587(7)     | 171            | $x, 1-y, z-\frac{1}{2}$                       |
|                 | C206-H206...N11 | 0.95       | 2.58         | 3.320(6)     | 136            | $x, 1-y, z-\frac{1}{2}$                       |
|                 | C213-H213...N40 | 0.95       | 2.59         | 3.519(7)     | 167            | $x, y, z$                                     |
|                 | C214-H214...N14 | 0.95       | 2.68         | 3.360(7)     | 129            | $x, 1-y, z+\frac{1}{2}$                       |
|                 | C215-H215...O34 | 0.95       | 2.66         | 3.330(7)     | 128            | $x, y, z$                                     |
|                 | C218-H218...N61 | 0.95       | 2.67         | 3.595(8)     | 166            | $x, y, z$                                     |
|                 | C219-H219...N31 | 0.95       | 2.68         | 3.256(7)     | 119            | $x, y, z$                                     |
|                 | C220-H220...N64 | 0.95       | 2.59         | 3.327(8)     | 135            | $1+x, 1+y, z$                                 |
|                 | C225-H225...N43 | 0.95       | 2.56         | 3.415(8)     | 150            | $x, 1-y, z-\frac{1}{2}$                       |
|                 | C100-H100...N42 | 0.95       | 2.70         | 3.343(7)     | 126            | $x, 1+y, z-1$                                 |
|                 | C106-H106...N63 | 0.95       | 2.67         | 3.519(7)     | 150            | $1+x, 1-y, z-\frac{1}{2}$                     |
|                 | C111-H111...N21 | 0.95       | 2.69         | 3.627(9)     | 168            | $x, -y, z+\frac{1}{2}$                        |
|                 | C113-H113...N61 | 0.95       | 2.68         | 3.449(8)     | 138            | $x, y, z$                                     |
|                 | C116-H116...N40 | 0.95       | 2.66         | 3.496(8)     | 146            | $x, y, z$                                     |
|                 | C121-H121...N13 | 0.95       | 2.55         | 3.441(8)     | 157            | $x, 1-y, z+\frac{1}{2}$                       |
|                 | C123-H123...N52 | 0.95       | 2.66         | 3.573(8)     | 163            | $x, 1-y, z-\frac{1}{2}$                       |
|                 | C126-H126...N21 | 0.95       | 2.59         | 3.498(8)     | 160            | $x, 1-y, z+\frac{1}{2}$                       |
|                 | C128-H128...N32 | 0.95       | 2.56         | 3.473(7)     | 161            | $x, y, z$                                     |
| <b>6</b>        | C10-H10...N60   | 0.95       | 2.57         | 3.325(6)     | 136            | $x, y, z$                                     |
|                 | C11-H11...N83   | 0.95       | 2.56         | 3.407(6)     | 148            | $\frac{1}{2}+x, \frac{1}{2}-y, z-\frac{1}{2}$ |
|                 | C14-H14...N74   | 0.95       | 2.63         | 3.302(6)     | 128            | $1-x, -y, 2-z$                                |
|                 | C15-H15...N94   | 0.95       | 2.60         | 3.452(7)     | 150            | $1.5-x, y-\frac{1}{2}, 1.5-z$                 |
|                 | C20-H20...O5    | 0.95       | 2.48         | 3.271(6)     | 140            | $x, y, z$                                     |
|                 | C34-H34...N84   | 0.95       | 2.52         | 3.281(6)     | 137            | $x, y, z$                                     |
|                 | C35-H35...N92   | 0.95       | 2.61         | 3.238(7)     | 125            | $x-\frac{1}{2}, \frac{1}{2}-y, \frac{1}{2}+z$ |
|                 | C36-H36...N92   | 0.95       | 2.68         | 3.259(7)     | 120            | $x-\frac{1}{2}, \frac{1}{2}-y, \frac{1}{2}+z$ |
|                 | C39-H39...N82   | 0.95       | 2.69         | 3.422(6)     | 134            | $x-\frac{1}{2}, \frac{1}{2}-y, z-\frac{1}{2}$ |
|                 | C53-H53...N64   | 0.95       | 2.51         | 3.379(7)     | 152            | $x-\frac{1}{2}, \frac{1}{2}-y, \frac{1}{2}+z$ |

Table S 3: Experimental details of the data collections

| Comp.                                                                       | 1                                                                 | 2                                                                 | 3                                                                 | 4                                                                 | 5                                                                                 | 6                                                                              |
|-----------------------------------------------------------------------------|-------------------------------------------------------------------|-------------------------------------------------------------------|-------------------------------------------------------------------|-------------------------------------------------------------------|-----------------------------------------------------------------------------------|--------------------------------------------------------------------------------|
| Empirical formula                                                           | C <sub>48</sub> H <sub>44</sub> Mg N <sub>14</sub> O <sub>6</sub> | C <sub>50</sub> H <sub>32</sub> Ca N <sub>16</sub> O <sub>4</sub> | C <sub>58</sub> H <sub>56</sub> N <sub>16</sub> O <sub>8</sub> Sr | C <sub>53</sub> H <sub>44</sub> N <sub>15</sub> O <sub>4</sub> Sr | C <sub>144</sub> H <sub>130</sub> Ba <sub>3</sub> N <sub>42</sub> O <sub>17</sub> | C <sub>97</sub> H <sub>74</sub> Ba <sub>2</sub> N <sub>29</sub> O <sub>7</sub> |
| Formula weight                                                              | 937.28                                                            | 960.99                                                            | 1192.80                                                           | 1042.65                                                           | 3132.91                                                                           | 2032.53                                                                        |
| Temperature                                                                 |                                                                   |                                                                   |                                                                   | 100(2) K                                                          |                                                                                   |                                                                                |
| Crystal system                                                              | Monoclinic                                                        | Monoclinic                                                        | Monoclinic                                                        | Triclinic                                                         | Monoclinic                                                                        | Monoclinic                                                                     |
| Space group                                                                 | C 2/c                                                             | P 2 <sub>1</sub>                                                  | P 2 <sub>1</sub> /c                                               | P -1                                                              | P c                                                                               | P 2 <sub>1</sub> /n                                                            |
| <i>a</i> [Å]                                                                | 12.9906(6)                                                        | 10.1121(3)                                                        | 15.0821(6)                                                        | 13.7982(6)                                                        | 27.3916(10)                                                                       | 14.6646(6)                                                                     |
| <i>b</i>                                                                    | 23.4010(12)                                                       | 23.5038(7)                                                        | 27.9091(9)                                                        | 14.7801(6)                                                        | 10.8213(5)                                                                        | 26.4428(9)                                                                     |
| <i>c</i>                                                                    | 16.3198(9)                                                        | 1042.02(4)                                                        | 28.5444(11)                                                       | 16.5180(7)                                                        | 24.8908(10)                                                                       | 24.9814(9)                                                                     |
| $\alpha$ [°]                                                                | 90                                                                | 90                                                                | 90                                                                | 64.558(1)                                                         | 90                                                                                | 90                                                                             |
| $\beta$                                                                     | 93.304(2)                                                         | 101.3760(10)                                                      | 96.121(1)                                                         | 66.682(1)                                                         | 95.662(1)                                                                         | 91.201(1)                                                                      |
| $\gamma$                                                                    | 90                                                                | 90                                                                | 90                                                                | 65.115(1)                                                         | 90                                                                                | 90                                                                             |
| Volume [Å <sup>3</sup> ]                                                    | 4952.9(4)                                                         | 2427.94(14)                                                       | 11946.6(8)                                                        | 2662.7(2)                                                         | 7342.0(5)                                                                         | 9685.0(6)                                                                      |
| <i>Z</i>                                                                    | 4                                                                 | 2                                                                 | 8                                                                 | 2                                                                 | 2                                                                                 | 4                                                                              |
| $\rho$ (calc) [g cm <sup>-3</sup> ]                                         | 1.257                                                             | 1.315                                                             | 1.326                                                             | 1.300                                                             | 1.417                                                                             | 1.394                                                                          |
| $\mu$ [mm <sup>-1</sup> ]                                                   | 0.098                                                             | 0.192                                                             | 0.969                                                             | 1.071                                                             | 0.873                                                                             | 0.878                                                                          |
| Crystal size [mm <sup>3</sup> ]                                             | 0.100 x 0.100 x 0.030                                             | 0.100 x 0.090 x 0.090                                             | 0.070 x 0.050 x 0.020                                             | 0.100 x 0.090 x 0.080                                             | 0.100 x 0.040 x 0.030                                                             | 0.110 x 0.100 x 0.080                                                          |
| $\Theta$ range                                                              | 3.004 – 25.053°.                                                  | 2.688 – 25.401°.                                                  | 2.167 – 25.090°.                                                  | 2.470 – 25.428°.                                                  | 2.927 – 25.090°.                                                                  | 2.218 – 25.418°.                                                               |
| Index ranges                                                                | -15 ≤ <i>h</i> ≤ 15, -27 ≤ <i>k</i> ≤ 27, -19 ≤ <i>l</i> ≤ 19     | -12 ≤ <i>h</i> ≤ 12, -28 ≤ <i>k</i> ≤ 28, -12 ≤ <i>l</i> ≤ 12     | -17 ≤ <i>h</i> ≤ 17, -33 ≤ <i>k</i> ≤ 33, -33 ≤ <i>l</i> ≤ 34     | -16 ≤ <i>h</i> ≤ 16, -17 ≤ <i>k</i> ≤ 17, -19 ≤ <i>l</i> ≤ 19     | -32 ≤ <i>h</i> ≤ 32, -12 ≤ <i>k</i> ≤ 12, -28 ≤ <i>l</i> ≤ 29                     | -17 ≤ <i>h</i> ≤ 17, -31 ≤ <i>k</i> ≤ 31, -30 ≤ <i>l</i> ≤ 30                  |
| Refl. Coll.                                                                 | 40090                                                             | 41909                                                             | 136596                                                            | 52710                                                             | 111386                                                                            | 158553                                                                         |
| Indep. Refl. [ <i>R</i> <sub>int</sub> ]                                    | 4378 [0.0780]                                                     | 8908 [0.0417]                                                     | 21133 [0.1326]                                                    | 9809 [0.0339]                                                     | 25549 [0.0429]                                                                    | 17832 [0.0596]                                                                 |
| Absorption correction                                                       |                                                                   |                                                                   |                                                                   | Multi-scan                                                        |                                                                                   |                                                                                |
| <i>T</i> <sub>max</sub> / <i>T</i> <sub>min</sub>                           | 0.7452 / 0.6575                                                   | 0.7452 / 0.7137                                                   | 0.7452 / 0.6737                                                   | 0.7452 / 0.7127                                                   | 0.7452 / 0.6848                                                                   | 0.7452 / 0.6702                                                                |
| Data / restr. / param.                                                      | 4378 / 0 / 327/                                                   | 8908 / 35 / 665                                                   | 21133 / 0 / 1528                                                  | 9809 / 31 / 726                                                   | 25549 / 214 / 1958                                                                | 17832 / 172 / 1288                                                             |
| GOOF on <i>F</i> <sup>2</sup>                                               | 1.074                                                             | 1.022                                                             | 0.994                                                             | 1.061                                                             | 1.036                                                                             | 1.191                                                                          |
| <i>R</i> <sub>1</sub> / <i>wR</i> <sub>2</sub> [ <i>I</i> > 2σ( <i>I</i> )] | 0.0535 / 0.1238                                                   | 0.0411 / 0.0930                                                   | 0.0426 / 0.0747                                                   | 0.0377 / 0.0937                                                   | 0.0285 / 0.0596                                                                   | 0.0464 / 0.0902                                                                |
| <i>R</i> <sub>1</sub> / <i>wR</i> <sub>2</sub> (all data)                   | 0.0905 / 0.1448                                                   | 0.0547 / 0.0998                                                   | 0.0993 / 0.0885                                                   | 0.0471 / 0.0987                                                   | 0.0347 / 0.0612                                                                   | 0.0678 / 0.0979                                                                |
| BASF                                                                        |                                                                   | 0.45(5)                                                           |                                                                   |                                                                   | 0.346(8)                                                                          |                                                                                |
| Extrema Fourier                                                             | 0.706 / -0.387                                                    | 0.649 / * -0.289                                                  | 0.453 / -0.641                                                    | 1.025 / -0.581                                                    | 0.659 / -0.342                                                                    | 0.975 / -0.781                                                                 |
| CCDC-#                                                                      | 2213249                                                           | 2213250                                                           | 2213252                                                           | 2213251                                                           | 2213253                                                                           | 2213254                                                                        |

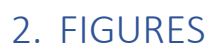

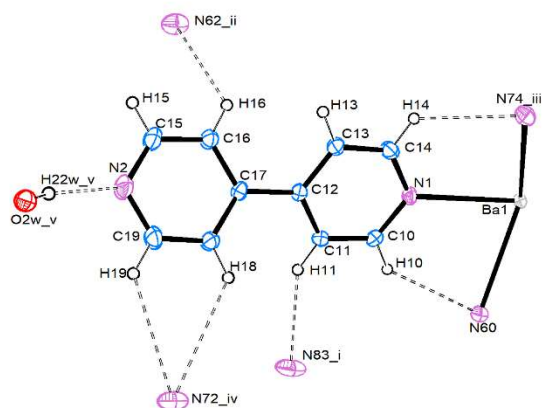

Figure S 3: The hydrogen bonds around bipyrindine I (C10-C19, N1/N2)

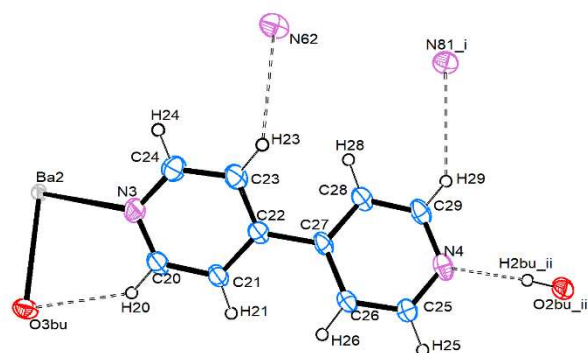

Figure S 4: The hydrogen bonds around bipyrindine II (C20-C29, N3/N4)

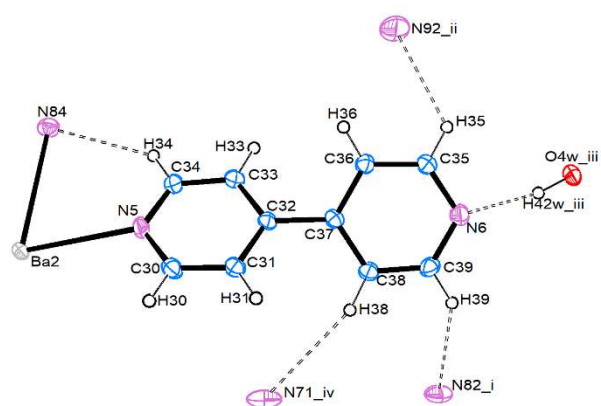

Figure S 5: The hydrogen bonds around bipyrindine III (C30-C39, N5/N6)



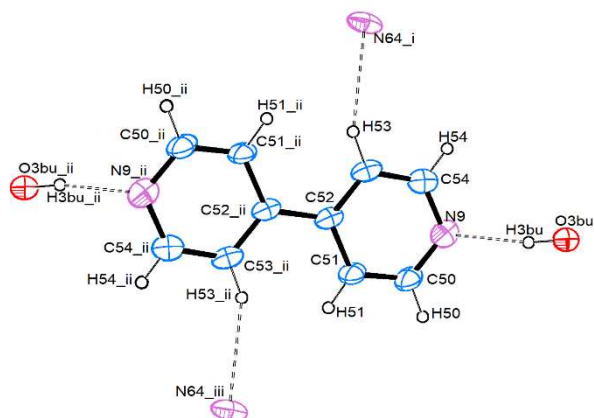

Figure S 6: The hydrogen bonds around bipyridine IV (C50-C54<sub>ii</sub>, N9/N9-ii)

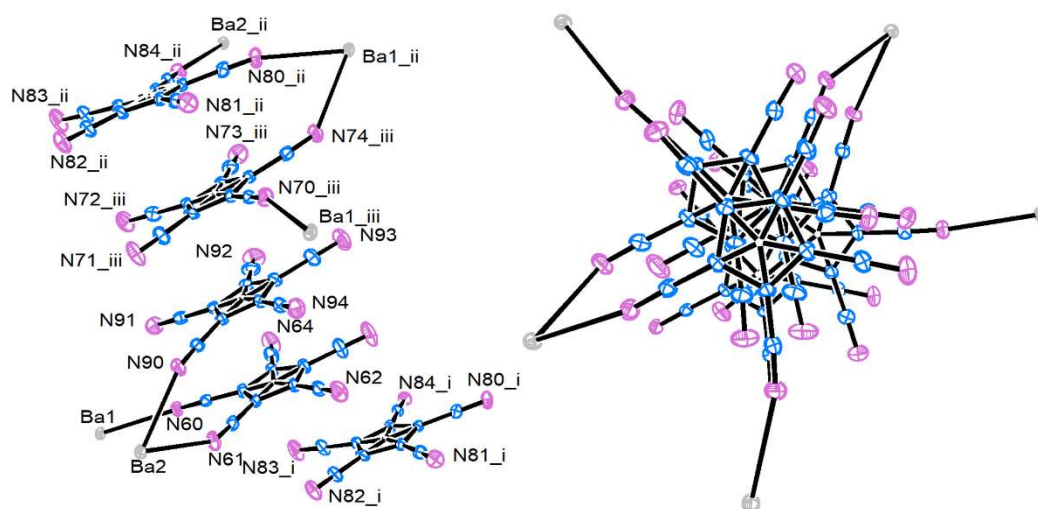

Figure S 7: The  $\pi$ -stacking of pentacyanocyclopentadienides in **6**: side view and top view

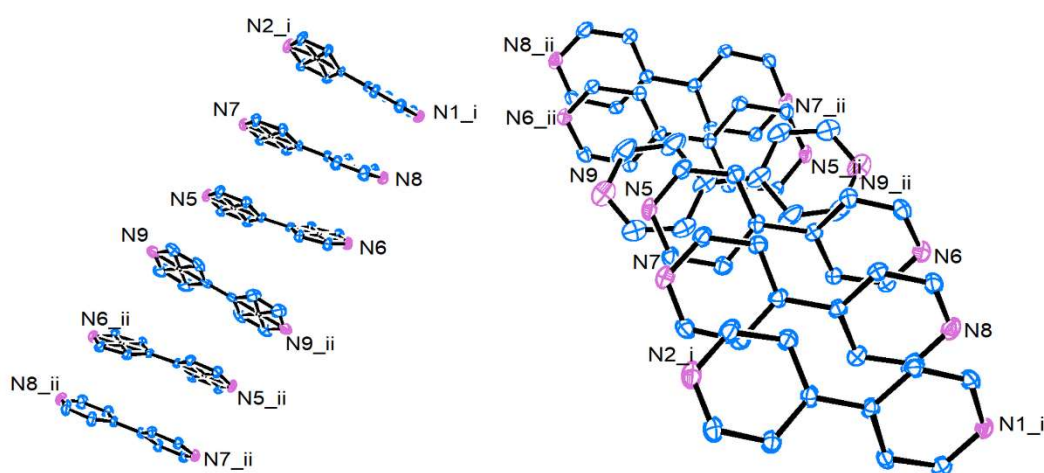

Figure S 8: The  $\pi$ -stacking of bipyridines in **6**: side view and top view.
